# Supplementary material
Source: PubMed Central journal article supplement (PMC2705019)
Supplement: pp.109.137950_2.pdf [file pp.109.137950_2.pdf]

**Supplementary Table 1**

| <b>protein</b>       | <b>Predotar</b>                          | <b>PSort</b>             | <b>TargetP</b>                           |
|----------------------|------------------------------------------|--------------------------|------------------------------------------|
| AthTrz <sup>S1</sup> | --                                       | cytoplasm                | --                                       |
| AthTrz <sup>S2</sup> | chloroplast                              | chloroplast              | chloroplast                              |
| AthTrz <sup>L1</sup> | chloroplast (42%)<br>mitochondrion (39%) | nucleus<br>mitochondrion | chloroplast (66%)<br>mitochondrion (68%) |
| AthTrz <sup>L2</sup> | chloroplast                              | chloroplast              | chloroplast                              |

**Predicted localisation of all four tRNase Z proteins.** Three different sorting servers were used to predict the localisation of the four tRNase Z proteins: WolfPSort (<http://wolfpSORT.org/>); TargetP ([www.cbs.dtu.dk/services/TargetP/](http://www.cbs.dtu.dk/services/TargetP/)); and Predotar ([urgi.versailles.inra.fr/predotar/predotar.html](http://urgi.versailles.inra.fr/predotar/predotar.html)).

**Supplementary Table 2**

| <b>AGI</b> | <b>gene name</b> | <b>protein</b>       | <b>aa</b> | <b>MW</b> | <b>pi</b> | <b>T-DNA line</b> |
|------------|------------------|----------------------|-----------|-----------|-----------|-------------------|
| At1g74700  | <i>TRZ1</i>      | AthTrz <sup>S1</sup> | 281       | 31.4      | 6.1       | GABI 69C04,       |
| At2g04530  | <i>TRZ2</i>      | AthTrz <sup>S2</sup> | 354       | 39.9      | 9.0       | SALK_098212       |
| At1g52160  | <i>TRZ3</i>      | AthTrz <sup>L1</sup> | 890       | 98.6      | 6.3       | GT-9807           |
| At3g16260  | <i>TRZ4</i>      | AthTrz <sup>L2</sup> | 942       | 104.7     | 8.0       | SALK_033700       |

**Overview over tRNase Z genes, proteins and T-DNA insertion mutants used in this study.** For each tRNase Z gene the AGI code, the protein length in amino acids (aa), the calculated molecular weight (MW) in kilodaltons (including the signal sequence), and the isoelectric point (pi) are given. In addition the names of the T-DNA insertion lines used in this work are shown.
